# Supplementary material for: Structure–Function Relationship Studies of Multidomain Levansucrases from Leuconostocaceae Family
Source: MDPI journal article supplement (doi:10.3390/microorganisms10050889), 2022-04-24
Supplement: s1 [file s1]

# Supplementary figures

**Table S1.** Primers used in this study. NcoI restriction site is underlined.

| Primer      | Sequence (5' to 3')                                          |
|-------------|--------------------------------------------------------------|
| SPS-NcoI    | CAT <u>GCC</u> ATG <u>GAT</u> ACT ACG AAC AGT ACA ACT        |
| SNT-NcoI    | CAT <u>GCC</u> ATG <u>GGA</u> AAA AAT GCT GAT GGT ACG        |
| pBAD-NcoIRv | CAT <u>GCC</u> ATG <u>GGT</u> ATG TAT ATC TCC TTC TTA AAG TT |

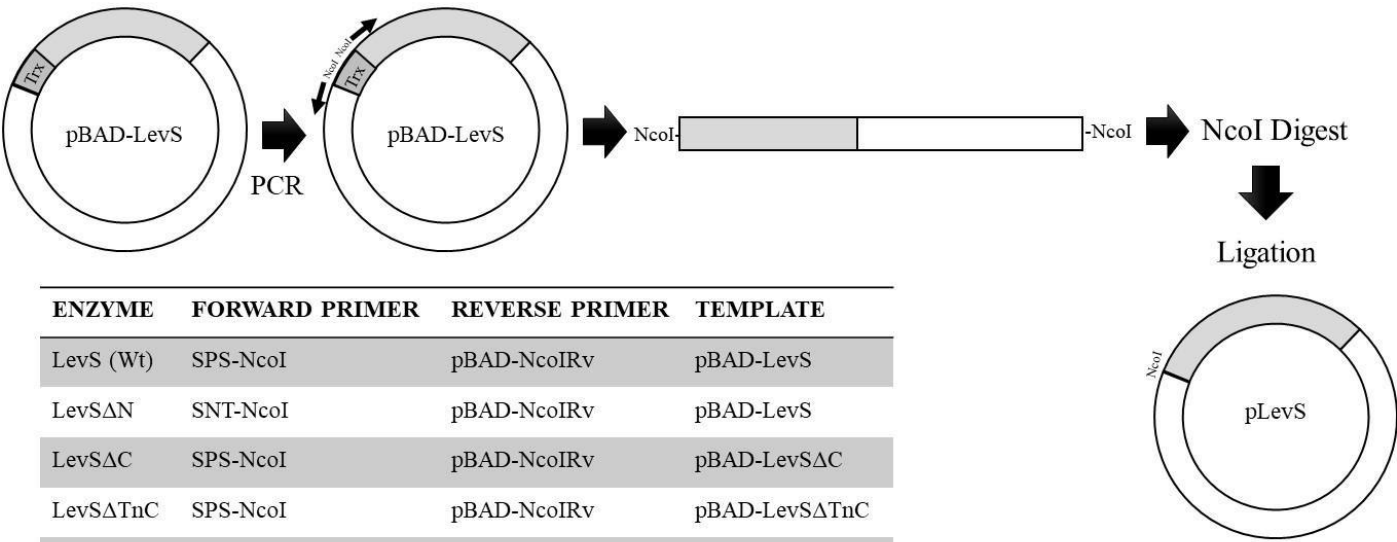

| ENZYME    | FORWARD PRIMER | REVERSE PRIMER | TEMPLATE      |
|-----------|----------------|----------------|---------------|
| LevS (Wt) | SPS-NcoI       | pBAD-NcoIRv    | pBAD-LevS     |
| LevSΔN    | SNT-NcoI       | pBAD-NcoIRv    | pBAD-LevS     |
| LevSΔC    | SPS-NcoI       | pBAD-NcoIRv    | pBAD-LevSΔC   |
| LevSΔTnC  | SPS-NcoI       | pBAD-NcoIRv    | pBAD-LevSΔTnC |
| LevSΔNC   | SNT-NcoI       | pBAD-NcoIRv    | pBAD-LevSΔC   |
| LevS/Cat  | SNT-NcoI       | pBAD-NcoIRv    | pBAD-LevS/Cat |

**Figure S1.** Strategy used for the elaboration of LevS and truncated version plasmids. Table shows the primers and templates used for each enzyme.

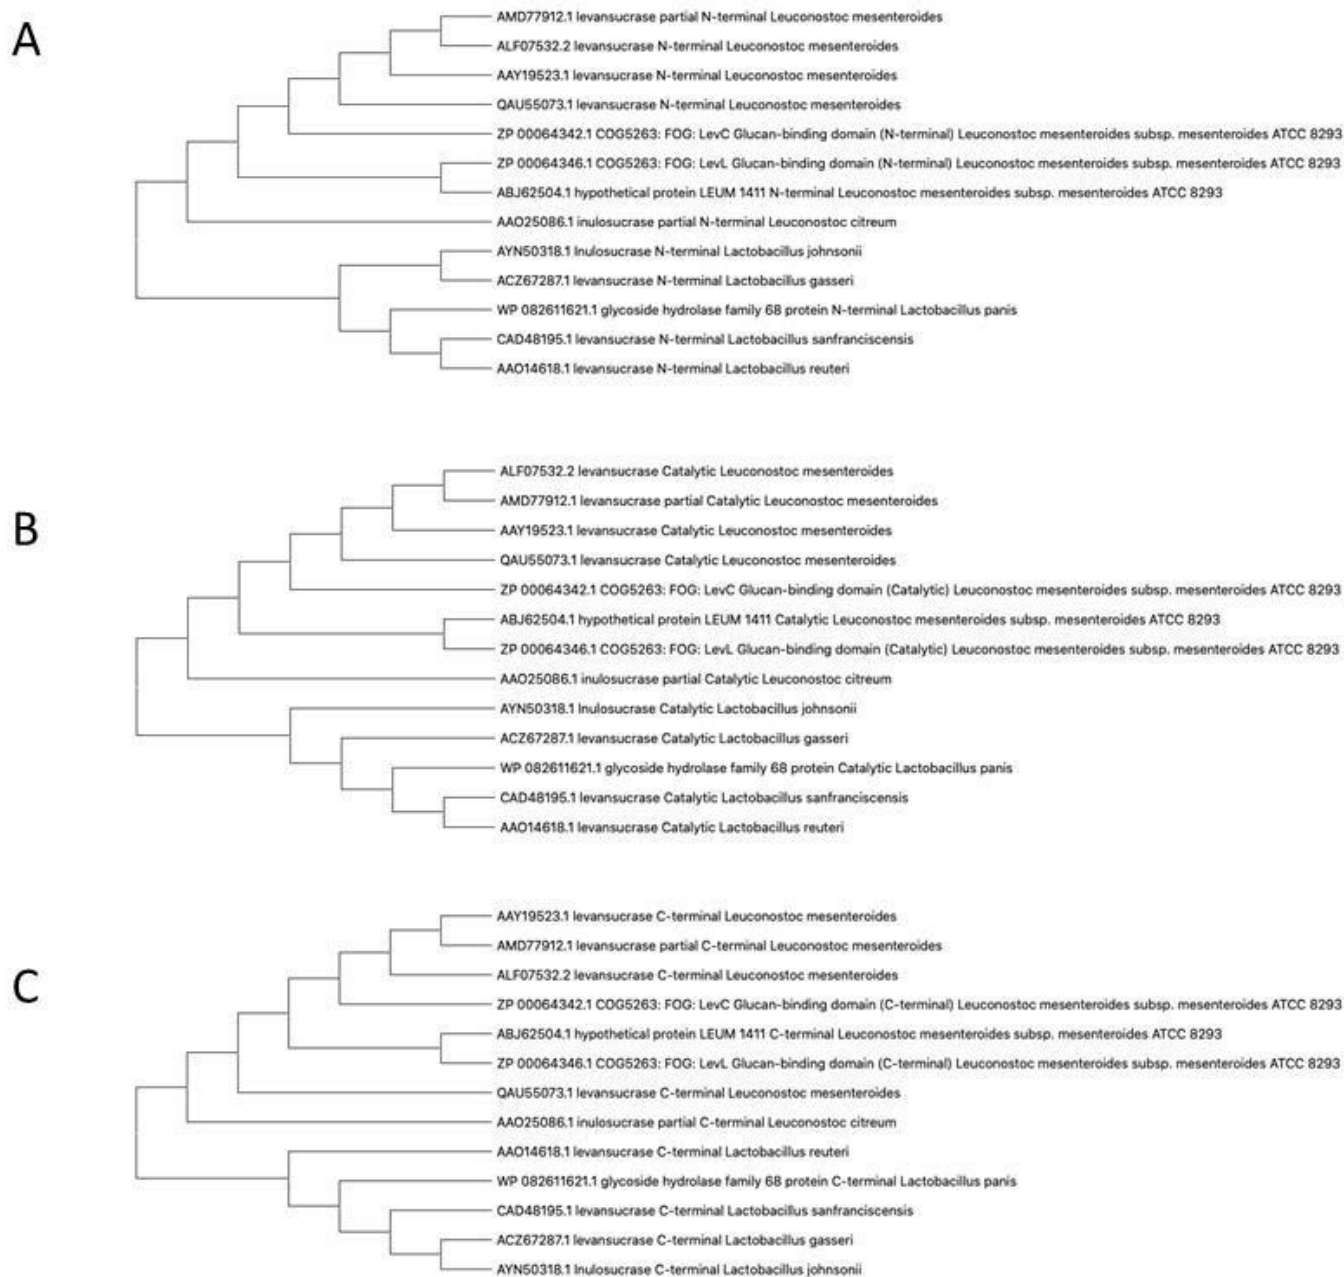

**Figure S2.** Phylogenetic analysis of the additional domain from MDFNs. A) Phylogenetic analysis of the N-terminal region from MDFNs. B) Phylogenetic analysis of the MDFNs catalytic domain. C) Phylogenetic analysis of the C-terminal region from MDFNs.
